# Supplementary material for: A Structural Basis for BRD2/4-Mediated Host Chromatin Interaction and Oligomer Assembly of Kaposi Sarcoma-Associated Herpesvirus and Murine Gammaherpesvirus LANA Proteins
Source: PubMed Central journal article supplement (PMC3798688; doi:10.1371/journal.ppat.1003640), 2013-10-17

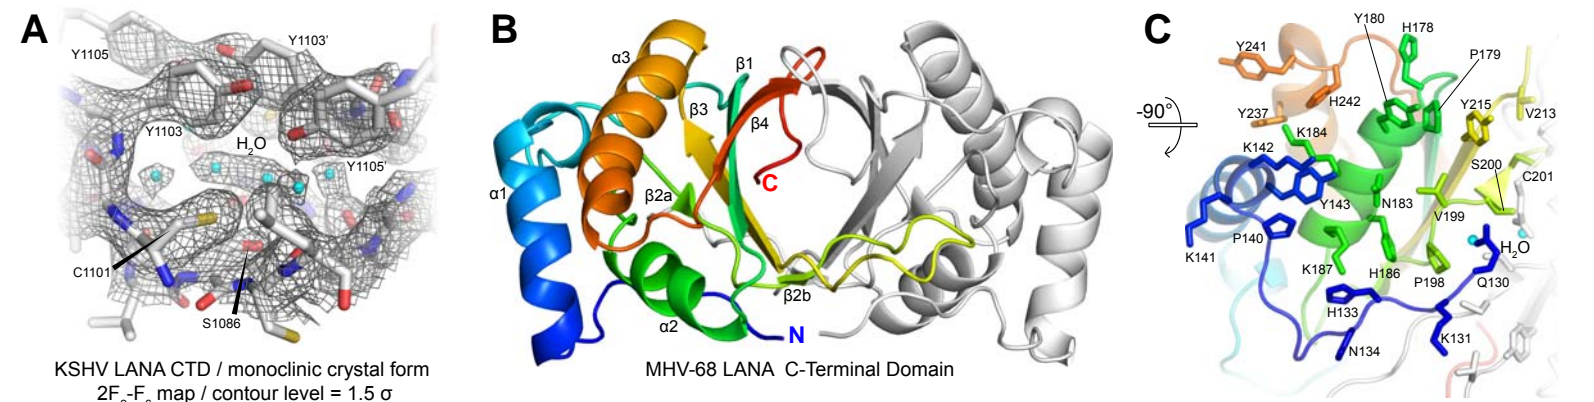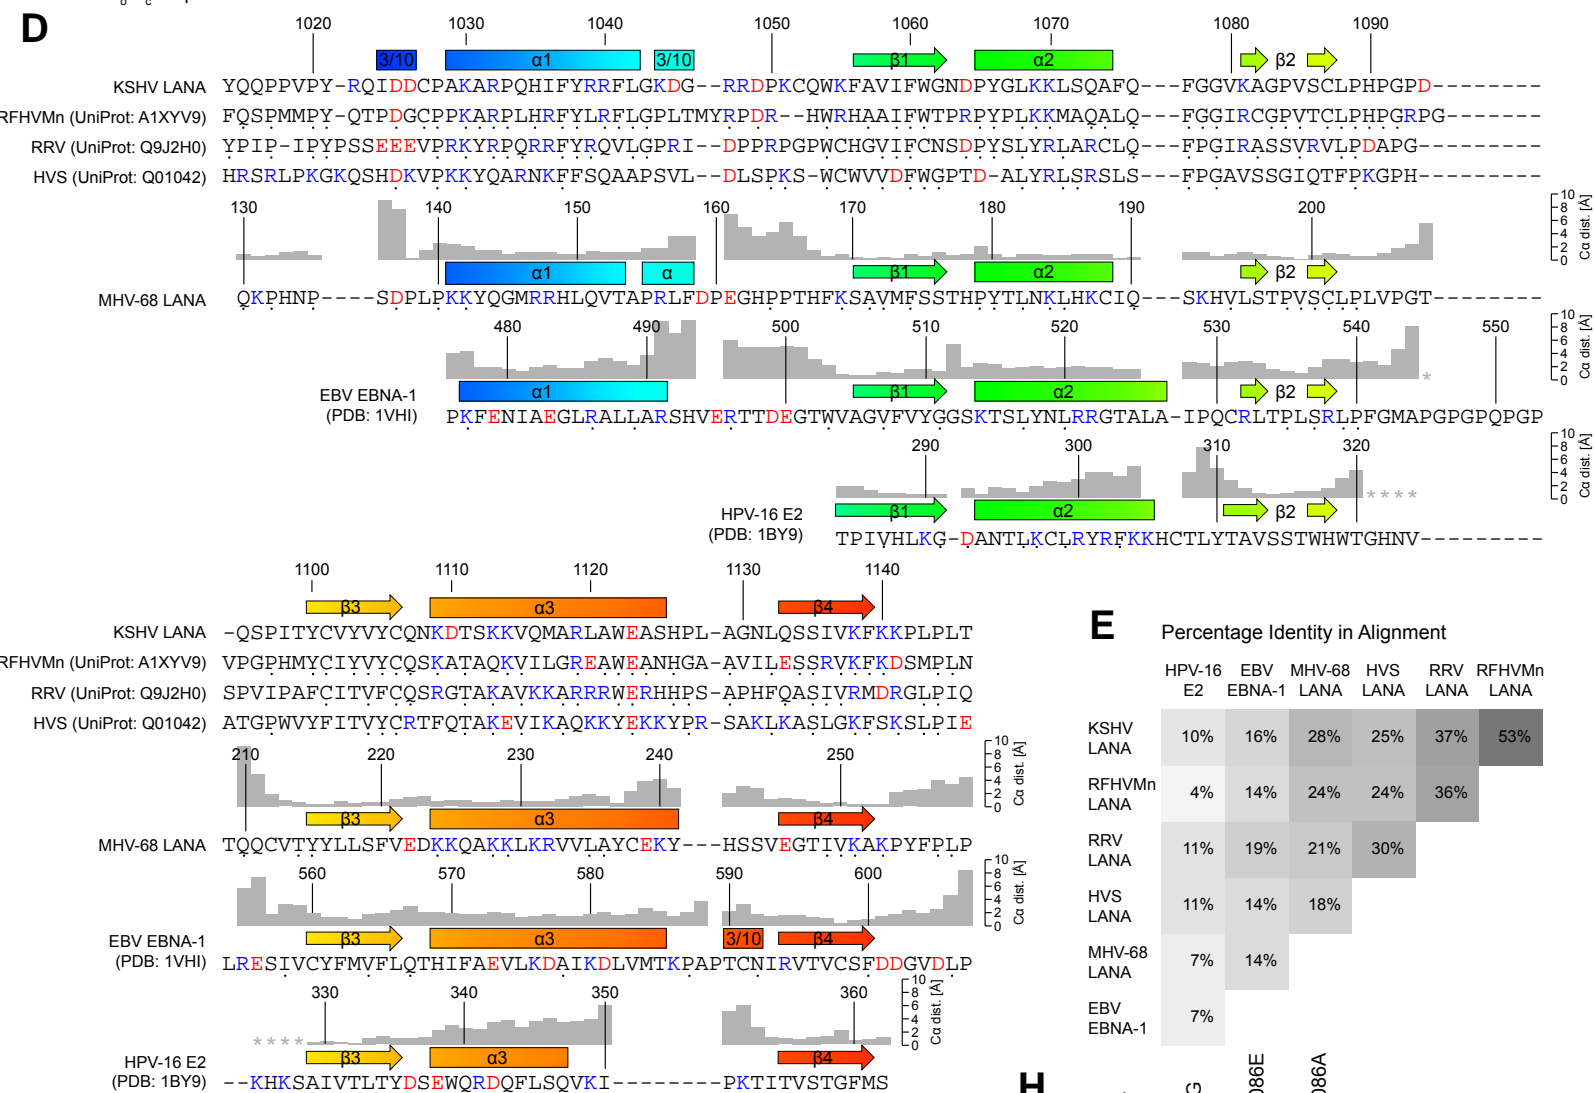

**E** Percentage Identity in Alignment

|             | HPV-16 E2 | EBV EBNA-1 | MHV-68 LANA | HVS LANA | RRV LANA | RFHVMn LANA |
|-------------|-----------|------------|-------------|----------|----------|-------------|
| KSHV LANA   | 10%       | 16%        | 28%         | 25%      | 37%      | 53%         |
| RFHVMn LANA | 4%        | 14%        | 24%         | 24%      | 36%      |             |
| RRV LANA    | 11%       | 19%        | 21%         | 30%      |          |             |
| HVS LANA    | 11%       | 14%        | 18%         |          |          |             |
| MHV-68 LANA | 7%        | 14%        |             |          |          |             |
| EBV EBNA-1  | 7%        |            |             |          |          |             |

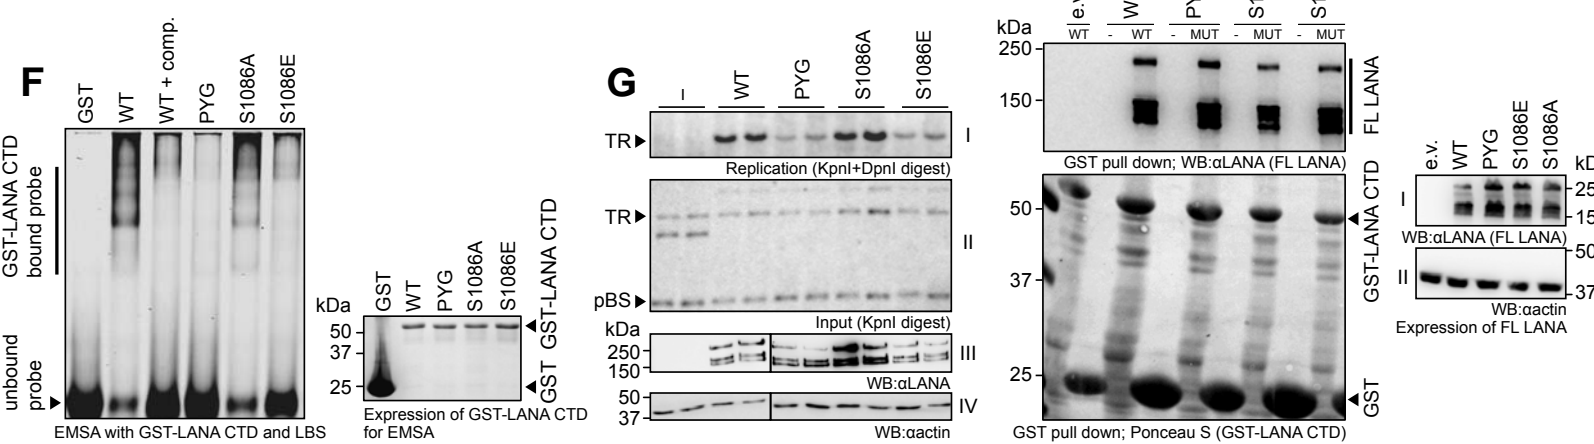

Supplement: ppat.1003640.s001.pdf [file ppat.1003640.s001.pdf]
